# Supplementary material for: Exocyst-mediated apical Wg secretion activates signaling in the Drosophila wing epithelium
Source: PubMed Central journal article supplement (PMC6764796; doi:10.1371/journal.pgen.1008351), 2019-09-17
Supplement: pgen.1008351.s007.pdf [file pgen.1008351.s007.pdf]

|     |     |               |             |             |                                     |    |        |                        |               |
|-----|-----|---------------|-------------|-------------|-------------------------------------|----|--------|------------------------|---------------|
| 113 | 119 | CG1708        | FBgn000352  | cos         | costa                               | KK | 108914 | No phenotype (remarks) | Other defects |
| 114 | 120 | CG8479        | FBgn0261276 | opa1-like   | optic atrophy 1-like                | KK | 106290 | No phenotype (remarks) | Other defects |
| 115 | 121 | CG7558        | FBgn0262716 | Arp3        | Actin-related protein 66B           | KK | 108951 | No phenotype (remarks) | Other defects |
|     | 122 | CG17515       | FBgn0039966 | Rab21       | Rab21                               | GD | 32941  | No phenotype (remarks) | Other defects |
| 116 | 123 | CG12403       | FBgn0020368 | Vha68-1     | Vha68-1                             | KK | 108701 | No phenotype           |               |
| 117 | 124 | CG3269        | FBgn0014009 | Rab2        | Rab-protein 2                       | KK | 105358 | No phenotype           |               |
| 118 | 125 | CG7576        | FBgn0005586 | Rab3        | Rab-protein 3                       | KK | 100787 | No phenotype           |               |
| 119 | 126 | CG4921        | FBgn0016701 | Rab4        | Rab-protein 4                       | KK | 106651 | No phenotype           |               |
|     | 127 | CG4921        | FBgn0016701 | Rab4        | Rab-protein 4                       | GD | 24672  | No phenotype           |               |
| 120 | 128 | CG5915        | FBgn0015795 | Rab7        | Rab-protein 7                       | GD | 40338  | No phenotype           |               |
| 121 | 129 | CG9994        | FBgn0032782 | Rab9        | Rab9                                | KK | 107192 | No phenotype           |               |
|     | 130 | CG9994        | FBgn0032782 | Rab9        | Rab9                                | GD | 36200  | No phenotype           |               |
|     | 131 | CG9994        | FBgn0032782 | Rab9        | Rab9                                | GD | 36201  | No phenotype           |               |
|     | 132 | CG9994        | FBgn0032782 | Rab9        | Rab9                                | GD | 43486  | No phenotype           |               |
| 122 | 133 | CG32678       | FBgn0067052 | Rab9D       | Rab GTPase 9D                       | KK | 109376 | No phenotype           |               |
| 134 | 134 | CG32678       | FBgn0067052 | Rab9D       | Rab GTPase 9D                       | GD | 49738  | No phenotype           |               |
| 123 | 135 | CG9807        | FBgn0030221 | Rab9Db      | Rab GTPase 9Db                      | KK | 109320 | No phenotype           |               |
|     | 136 | CG9807        | FBgn0030221 | Rab9Db      | Rab GTPase 9Db                      | KK | 190889 | No phenotype           |               |
|     | 137 | CG9807        | FBgn0030221 | Rab9Db      | Rab GTPase 9Db                      | GD | 29282  | No phenotype           |               |
| 124 | 138 | CG32671       | FBgn0052671 | Rab9Fa      | Rab GTPase 9Fa                      | KK | 116172 | No phenotype           |               |
|     | 139 | CG17515       | FBgn0039966 | Rab21       | Rab21                               | KK | 109991 | No phenotype           |               |
| 125 | 140 | CG34410       | FBgn0086913 | Rab26       | Rab26                               | KK | 101330 | No phenotype           |               |
|     | 141 | CG34410       | FBgn0086913 | Rab26       | Rab26                               | GD | 43730  | No phenotype           |               |
| 126 | 142 | CG8024        | FBgn0002567 | ltd         | Rab32                               | KK | 104348 | No phenotype           |               |
| 127 | 143 | CG12156       | FBgn0029959 | Rab39       | Rab39                               | GD | 31665  | No phenotype           |               |
| 128 | 144 | CG1900        | FBgn0030391 | Rab40       | Rab40                               | KK | 110563 | No phenotype           |               |
| 129 | 145 | CG3870        | FBgn0015372 | RabX1       | chrowded                            | KK | 103039 | No phenotype           |               |
| 130 | 146 | CG2885        | FBgn0030200 | RabX2       | RabX2                               | KK | 103311 | No phenotype           |               |
|     | 147 | CG2885        | FBgn0030200 | RabX2       | RabX2                               | GD | 49851  | No phenotype           |               |
| 131 | 148 | CG32670       | FBgn0052670 | Rab9Fb      | Rab GTPase 9Fb                      | KK | 102312 | No phenotype           |               |
| 132 | 149 | CG7980        | FBgn0035255 | RabX5       | RabX5                               | KK | 103630 | No phenotype           |               |
|     | 150 | CG7980        | FBgn0035255 | RabX5       | RabX5                               | GD | 28169  | No phenotype           |               |
| 133 | 151 | CG12015       | FBgn0035155 | RabX6       | RabX6                               | KK | 101654 | No phenotype           |               |
|     | 152 | CG12015       | FBgn0035155 | RabX6       | RabX6                               | GD | 50817  | No phenotype           |               |
| 134 | 153 | CG7062        | FBgn0015793 | Rab19       | Rab-related protein 3               | KK | 103653 | No phenotype           |               |
|     | 154 | CG7062        | FBgn0015793 | Rab19       | Rab-related protein 3               | GD | 34190  | No phenotype           |               |
| 135 | 155 | CG6213        | FBgn0026753 | Vha13       | Vacuolar H+ ATPase G-subunit        | KK | 106536 | No phenotype           |               |
| 136 | 156 | CG1076        | FBgn0037402 | Vha14-2     |                                     | KK | 102478 | No phenotype           |               |
| 137 | 157 | CG32089       | FBgn0028668 | Vha16-2     | Vha16-2                             | KK | 106520 | No phenotype           |               |
| 138 | 158 | CG32090       | FBgn0028667 | Vha16-3     | Vha16-3                             | KK | 102067 | No phenotype           |               |
| 139 | 159 | CG9013        | FBgn0262513 | Vha16-4     | Vha16-4                             | KK | 107375 | No phenotype           |               |
| 140 | 160 | CG6737        | FBgn0032294 | Vha16-5     | Vha16-5                             | KK | 107481 | No phenotype           |               |
| 141 | 161 | CG8186/CG7433 | unknown ID  |             | Vha36                               | KK | 110468 | No phenotype           |               |
| 142 | 162 | CG13167       | FBgn0033706 | Vha36-2     | CG13167                             | KK | 104111 | No phenotype           |               |
| 143 | 163 | CG8310        | FBgn0040377 | Vha36-3     | CG8310                              | KK | 104048 | No phenotype           |               |
| 144 | 164 | CG5075        | FBgn0032464 | Vha68-3     | Vacuolar H+ATPase 68kD A subunit    | GD | 41646  | No phenotype           |               |
| 145 | 165 | CG1709        | FBgn0028671 | Vha100-1    | Vha100-1                            | KK | 108905 | No phenotype           |               |
| 146 | 166 | CG30329       | FBgn0028669 | Vha100-3    | Vha100-3                            | KK | 110051 | No phenotype           |               |
| 147 | 167 | CG12602       | FBgn0032373 | Vha100-5    | CG12602                             | KK | 106811 | No phenotype           |               |
| 148 | 168 | CG4624        | FBgn0039058 | VhaAC39-2   |                                     | GD | 34303  | No phenotype           |               |
| 149 | 169 | CG11589       | FBgn0028664 | VhaM9.7-c   | VhaM9.7-c                           | KK | 101574 | No phenotype           |               |
| 150 | 170 | CG7625        | FBgn0028663 | VhaM9.7-b   | VhaM9.7-2                           | GD | 30384  | No phenotype           |               |
| 151 | 171 | CG14909       | FBgn0033458 | VhaM9.7-d   |                                     | KK | 106115 | No phenotype           |               |
| 152 | 172 | CG1268        | FBgn0035521 | VhaM9.7-a   | CG1268                              | KK | 104315 | No phenotype           |               |
| 153 | 173 | CG7028        | FBgn0262514 | VhaPPA1-2   | VhaPPA1-2                           | GD | 48830  | No phenotype           |               |
| 154 | 174 | CG13762       | FBgn0040333 | brv3        | CG13762                             | KK | 101019 | No phenotype           |               |
| 155 | 175 | CG7127        | FBgn0035892 | exo70       | exo70                               | KK | 103717 | No phenotype           |               |
| 156 | 176 | CG14214       | FBgn0031049 | Sec61gamma  | Sec61gamma                          | KK | 108003 | No phenotype           |               |
| 157 | 177 | CG8454        | FBgn0261241 | Vps16A      | dVps16A,Vps16A                      | GD | 23769  | No phenotype           |               |
| 158 | 178 | CG4071        | FBgn0034744 | Vps20       | anon-EST:Posey40.vps...             | GD | 28388  | No phenotype           |               |
| 159 | 179 | CG3093        | FBgn0000482 | dor         | deep orange                         | GD | 102176 | No phenotype           |               |
| 160 | 180 | CG5373        | FBgn0015277 | Pl3k59F     | Phosphatidylinositol 3 kinase 59F   | KK | 107602 | No phenotype           |               |
| 161 | 181 | CG4471        | FBgn0033137 | Tsp42Ep     | Tetraspanin 42Ep                    | KK | 108515 | No phenotype           |               |
| 162 | 182 | CG9494        | FBgn0032074 | Tsp29Fa     | Tetraspanin 29Fa                    | KK | 105839 | No phenotype           |               |
| 163 | 183 | CG9093        | FBgn0031760 | Tsp26A      | Tetraspanin 26A                     | KK | 101473 | No phenotype           |               |
| 164 | 184 | CG8666        | FBgn0032943 | Tsp39D      | Tetraspanin 39D                     | KK | 107776 | No phenotype           |               |
| 165 | 185 | CG4999        | FBgn0035936 | Tsp66E      | Tetraspanin 66E                     | KK | 104430 | No phenotype           |               |
| 166 | 186 | CG4690        | FBgn0029837 | Tsp5D       | Dm.Tsp5D.Tetraspanin...             | GD | 45740  | No phenotype           |               |
| 167 | 187 | CG32136       | FBgn0043550 | Tsp68C      | Dm.Tsp68C.Tetraspanin...            | GD | 37441  | No phenotype           |               |
| 168 | 188 | CG18817       | FBgn0029508 | Tsp42Ea     | Q9U3V4_BcDNA:GH05668...             | KK | 109172 | No phenotype           |               |
| 169 | 189 | CG18816       | FBgn0042086 | Tsp42Eb     | LP06288_BEST:LP06288...             | KK | 49692  | No phenotype           |               |
| 170 | 190 | CG14936       | FBgn0032376 | Tsp33B      | Tetraspanin 33B                     | KK | 104079 | No phenotype           |               |
|     | 191 | CG14936       | FBgn0032376 | Tsp33B      | Dm.Tsp33B.Tetraspani...             | GD | 6123   | No phenotype           |               |
| 171 | 192 | CG14468       | FBgn0033042 | Tsp42A      | Dm.Tsp42A.Tetraspani...             | KK | 109889 | No phenotype           |               |
| 172 | 193 | CG12847       | FBgn0033124 | Tsp42Ec     | Dm.Tsp42Ec.tetraspan...             | GD | 37149  | No phenotype           |               |
|     | 194 | CG12847       | FBgn0033124 | Tsp42Ec     | Dm.Tsp42Ec.tetraspan...             | GD | 43534  | No phenotype           |               |
| 173 | 195 | CG12844       | FBgn0033129 | Tsp42Eh     | Dm.Tsp42Eh.tetraspan...             | KK | 102178 | No phenotype           |               |
|     | 196 | CG12844       | FBgn0033129 | Tsp42Eh     | Dm.Tsp42Eh.tetraspan...             | GD | 48973  | No phenotype           |               |
| 174 | 197 | CG12843       | FBgn0033130 | Tsp42Ei     | Tetraspanin 42Ei                    | KK | 101044 | No phenotype           |               |
|     | 198 | CG12843       | FBgn0033130 | Tsp42Ei     | Dm.Tsp42Ei.tetraspan...             | KK | 101044 | No phenotype           |               |
|     | 199 | CG12841       | FBgn0033133 | Tsp42Ek     | Tetraspanin 42Ek                    | KK | 102294 | No phenotype           |               |
|     | 200 | CG12839       | FBgn0033135 | Tsp42En     | BcDNA:RH02160.Dm.Tsp...             | GD | 37473  | No phenotype           |               |
| 175 | 201 | CG12837       | FBgn0033139 | Tsp42Er     | Dm.Tsp42Er.tetraspan...             | KK | 104950 | No phenotype           |               |
| 176 | 202 | CG12832       | FBgn0033138 | Tsp42Eq     | Tetraspanin 42Eq                    | KK | 101926 | No phenotype           |               |
| 177 | 203 | CG12143       | FBgn0033132 | Tsp42Ej     | Dm.Tsp42Ej.sun.Sun.s...             | KK | 105191 | No phenotype           |               |
| 178 | 204 | CG12142       | FBgn0033128 | Tsp42Eg     | BcDNA:GM06962.Dm.Tsp...             | KK | 108430 | No phenotype           |               |
| 205 | 205 | CG32136       | FBgn0043550 | Tsp68C      | Tetraspanin 68C                     | KK | 101945 | No phenotype           |               |
| 179 | 206 | CG10067       | FBgn0000044 | Act57B      | Actin 57B                           | KK | 102129 | No phenotype           |               |
| 180 | 207 | CG10090       | FBgn0030318 | Tim17a1     | Tim17a1                             | KK | 101139 | No phenotype           |               |
| 181 | 208 | CG10188       | FBgn0032796 | CG10188     | -                                   | KK | 103391 | No phenotype           |               |
| 182 | 209 | CG10225       | FBgn0039110 | RanBP3      | -                                   | KK | 104432 | No phenotype           |               |
| 183 | 210 | CG10478       | FBgn0035657 | alphaKap4   | -                                   | KK | 108143 | No phenotype           |               |
| 184 | 211 | CG10642       | FBgn0004380 | Klp64D      | Kinesin-like protein at 64D         | KK | 103358 | No phenotype           |               |
| 185 | 212 | CG10718       | FBgn0004374 | neb         | nebbish                             | KK | 108138 | No phenotype           |               |
| 186 | 213 | CG10907       | FBgn0036207 | CG10907     | -                                   | KK | 103623 | No phenotype           |               |
| 187 | 214 | CG11092       | FBgn0045656 | DsimCG11092 | -                                   | KK | 100315 | No phenotype           |               |
| 188 | 215 | CG11110       | FBgn0034535 | CG11110     | -                                   | KK | 106768 | No phenotype           |               |
| 189 | 216 | CG11173       | FBgn0034913 | usnp        | ubisnap                             | KK | 107947 | No phenotype           |               |
| 190 | 217 | CG11211       | FBgn0033067 | CG11211     | -                                   | KK | 107118 | No phenotype           |               |
| 191 | 218 | CG11611       | FBgn0036204 | Tim13       | Tim13                               | KK | 100776 | No phenotype           |               |
| 192 | 219 | CG11759       | FBgn0028421 | Kap3        | Kinesin associated protein 3        | KK | 103548 | No phenotype           |               |
| 193 | 220 | CG11771       | FBgn0039252 | CG11771     | -                                   | KK | 108188 | No phenotype           |               |
| 194 | 221 | CG11838       | FBgn0260933 | rempA       | reduced mechanoreceptor potential A | KK | 103424 | No phenotype           |               |
| 195 | 222 | CG11958       | FBgn0015622 | Cnx99A      | Calnexin 99A                        | KK | 100740 | No phenotype           |               |
| 196 | 223 | CG12051       | FBgn0000043 | Act42A      | Actin 42A                           | KK | 104731 | No phenotype           |               |
| 197 | 224 | CG12092       | FBgn0261675 | Npc1b       | NPC1b                               | KK | 108054 | No phenotype           |               |
| 198 | 225 | CG12147       | FBgn0037325 | CG12147     | -                                   | KK | 101875 | No phenotype           |               |
| 199 | 226 | CG12500       | FBgn0016976 | stnA        | stoned A                            | KK | 105203 | No phenotype           |               |
| 200 | 227 | CG12817       | FBgn0037798 | CG12817     | -                                   | KK | 106952 | No phenotype           |               |
| 201 | 228 | CG13137       | FBgn0032188 | CG13137     | -                                   | KK | 107865 | No phenotype           |               |
| 202 | 229 | CG13396       | FBgn0001084 | fy          | fuzzy                               | KK | 108550 | No phenotype           |               |
| 203 | 230 | CG13425       | FBgn0015907 | bl          | bancai                              | KK | 105271 | No phenotype           |               |
| 204 | 231 | CG13887       | FBgn0035165 | CG13887     | -                                   | KK | 106452 | No phenotype           |               |
| 205 | 232 | CG13892       | FBgn0035141 | Cypl        | Cyclophilin-like                    | KK | 104316 | No phenotype           |               |
| 206 | 233 | CG13930       | FBgn0035256 | CG13930     | -                                   | KK | 104545 | No phenotype           |               |
| 207 | 234 | CG1418        | FBgn0033468 | CG1418      | -                                   | KK | 104571 | No phenotype           |               |
| 208 | 235 | CG14411       | FBgn0084085 | DyakGE17154 | -                                   | KK | 109622 | No phenotype           |               |
| 209 | 236 | CG14535       | FBgn0031955 | CG14535     | -                                   | KK | 108308 | No phenotype           |               |
| 210 | 237 | CG14666       | FBgn0037307 | Tim17a2     | Tim17a2                             | KK | 107739 | No phenotype           |               |
| 211 | 238 | CG1467        | FBgn0031106 | Syx16       | Syntaxin 16                         | KK | 109504 | No phenotype           |               |
| 212 | 239 | CG14690       | FBgn0037828 | lombv20     | lombv20                             | KK | 100931 | No phenotype           |               |
| 213 | 240 | CG14838       | FBgn0035799 | CG14838     | -                                   | KK | 105707 | No phenotype           |               |
| 214 | 241 | CG1487        | FBgn0040206 | krz         | kurtz                               | KK | 103756 | No phenotype           |               |
| 215 | 242 | CG1514        | FBgn0068694 | DsimGD16870 | -                                   | KK | 105871 | No phenotype           |               |
| 216 | 243 | CG15701       | FBgn0034095 | CG15701     | os                                  | KK | 107983 | No phenotype           |               |

|     |     |         |             |              |                                                         |    |        |              |
|-----|-----|---------|-------------|--------------|---------------------------------------------------------|----|--------|--------------|
| 217 | 244 | CG15844 | FBgn0263029 | CG43324      | Kinesin-like protein at 54D                             | KK | 100140 | No phenotype |
| 218 | 245 | CG1599  | FBgn0033452 | CG1599       | -                                                       | KK | 108733 | No phenotype |
| 219 | 246 | CG1618  | FBgn0000346 | comt         | comatose                                                | KK | 105552 | No phenotype |
| 220 | 247 | CG1657  | FBgn0030286 | CG1657       | -                                                       | KK | 108453 | No phenotype |
| 221 | 248 | CG1660  | FBgn0030480 | Tim9a        | Tim9a                                                   | KK | 104476 | No phenotype |
| 222 | 249 | CG16834 | FBgn0040096 | lectin-33A   | lectin-33A                                              | KK | 108412 | No phenotype |
| 223 | 250 | CG16892 | FBgn0030122 | CG16892      | -                                                       | KK | 101415 | No phenotype |
| 224 | 251 | CG16932 | FBgn0035060 | Eps-15       | EGF receptor pathway substrate clone 15                 | KK | 106678 | No phenotype |
| 225 | 252 | CG17262 | FBgn0243513 | cnir         | cornichon related                                       | KK | 104009 | No phenotype |
| 226 | 253 | CG17271 | FBgn0038829 | CG17271      | -                                                       | KK | 101754 | No phenotype |
| 227 | 254 | CG17271 | FBgn0038829 | CG17271      | -                                                       | KK | 103101 | No phenotype |
| 227 | 255 | CG17566 | FBgn0010097 | gammaTub37C  | gamma-Tubulin at 37C                                    | KK | 109921 | No phenotype |
| 228 | 256 | CG18000 | FBgn0003654 | sw           | short wing                                              | KK | 101559 | No phenotype |
| 229 | 257 | CG18290 | FBgn0000048 | Act87E       | Actin 87E                                               | KK | 102480 | No phenotype |
| 230 | 258 | CG1924  | FBgn0030377 | CG1924       | -                                                       | KK | 102773 | No phenotype |
| 231 | 259 | CG2219  | FBgn0039889 | CG2219       | -                                                       | KK | 107995 | No phenotype |
| 232 | 260 | CG2520  | FBgn0083813 | Dhuz1CG2520  | like-AP180                                              | KK | 105787 | No phenotype |
| 233 | 261 | CG2577  | FBgn0030384 | CG2577       | -                                                       | KK | 105471 | No phenotype |
| 234 | 262 | CG2715  | FBgn0024980 | Syx4         | Syntaxin 4                                              | KK | 102466 | No phenotype |
| 235 | 263 | CG2852  | FBgn0034753 | CG2852       | -                                                       | KK | 102376 | No phenotype |
| 236 | 264 | CG2999  | FBgn0025726 | unc-13       | unc-13                                                  | KK | 101383 | No phenotype |
| 237 | 265 | CG3093  | FBgn0000482 | dor          | deep orange                                             | KK | 107053 | No phenotype |
| 237 | 266 | CG31495 | FBgn0051495 | CG31495      | -                                                       | KK | 105777 | No phenotype |
| 238 | 267 | CG31721 | FBgn0051721 | Trim9        | Trim9                                                   | KK | 100767 | No phenotype |
| 239 | 268 | CG31787 | FBgn0051787 | CG31787      | -                                                       | KK | 107111 | No phenotype |
| 240 | 269 | CG32239 | FBgn0084660 | DmirCG32239  | Guanine nucleotide exchange factor GEF64C               | KK | 105252 | No phenotype |
| 241 | 270 | CG32350 | FBgn0052350 | CG32350      | -                                                       | KK | 107420 | No phenotype |
| 242 | 271 | CG32381 | FBgn0035756 | unc-13-4A    | unc-13-4A                                               | KK | 109304 | No phenotype |
| 243 | 272 | CG32392 | FBgn0052392 | CG32392      | -                                                       | KK | 100592 | No phenotype |
| 244 | 273 | CG32562 | FBgn0028974 | xmas-2       | xmas-2                                                  | KK | 104156 | No phenotype |
| 245 | 274 | CG32701 | FBgn0028327 | l(1)G0320    | lethal (1) G0320                                        | KK | 110344 | No phenotype |
| 246 | 275 | CG33180 | FBgn0053180 | Ranbp16      | Ranbp16                                                 | KK | 107391 | No phenotype |
| 247 | 276 | CG33214 | FBgn0264561 | Glg1         | -                                                       | KK | 108284 | No phenotype |
| 248 | 277 | CG3401  | FBgn0003888 | betaTub60D   | beta-Tubulin at 60D                                     | KK | 102052 | No phenotype |
| 248 | 278 | CG3401  | FBgn0003888 | betaTub60D   | beta-Tubulin at 60D                                     | KK | 104937 | No phenotype |
| 249 | 279 | CG34397 | FBgn0085426 | Rgk3         | Rgk3                                                    | KK | 106428 | No phenotype |
| 250 | 280 | CG34414 | FBgn0085443 | spr1         | sprint                                                  | KK | 101164 | No phenotype |
| 251 | 281 | CG3499  | FBgn0034792 | CG3499       | -                                                       | KK | 105143 | No phenotype |
| 252 | 282 | CG3585  | FBgn0023458 | Rbcn-3A      | Rabconnectin-3A                                         | KK | 108547 | No phenotype |
| 253 | 283 | CG3869  | FBgn0029870 | Marf         | Mitochondrial assembly regulatory factor                | KK | 105261 | No phenotype |
| 254 | 284 | CG3911  | FBgn0260859 | Bet3         | -                                                       | KK | 104469 | No phenotype |
| 255 | 285 | CG3988  | FBgn0028552 | gammaSnap    | gamma-soluble NSF attachment protein                    | KK | 100738 | No phenotype |
| 256 | 286 | CG4030  | FBgn0034585 | CG4030       | -                                                       | KK | 110346 | No phenotype |
| 257 | 287 | CG4074  | FBgn0037017 | CG4074       | -                                                       | KK | 104859 | No phenotype |
| 258 | 288 | CG4325  | FBgn0026878 | CG4325       | -                                                       | KK | 102993 | No phenotype |
| 259 | 289 | CG4453  | FBgn0086002 | DsimNup153   | Nup153                                                  | KK | 107750 | No phenotype |
| 260 | 290 | CG4532  | FBgn0029903 | pod1         | pod1                                                    | KK | 108886 | No phenotype |
| 261 | 291 | CG4663  | FBgn0033812 | Pex13        | -                                                       | KK | 108829 | No phenotype |
| 262 | 292 | CG4764  | FBgn0084168 | DsimGD23074  | -                                                       | KK | 101375 | No phenotype |
| 263 | 293 | CG4789  | FBgn0030792 | CG4789       | -                                                       | KK | 101535 | No phenotype |
| 264 | 294 | CG4799  | FBgn0011823 | Pen          | Pendulin                                                | KK | 102627 | No phenotype |
| 265 | 295 | CG4886  | FBgn0028382 | cyp33        | cyclophilin-33                                          | KK | 108734 | No phenotype |
| 266 | 296 | CG5020  | FBgn0020503 | CLIP-190     | Cytoplasmic linker protein 190                          | KK | 107176 | No phenotype |
| 267 | 297 | CG5026  | FBgn0035945 | CG5026       | -                                                       | KK | 105674 | No phenotype |
| 268 | 298 | CG5071  | FBgn0039347 | CG5071       | -                                                       | KK | 101332 | No phenotype |
| 269 | 299 | CG5140  | FBgn0034314 | nope         | no poles                                                | KK | 104477 | No phenotype |
| 270 | 300 | CG5373  | FBgn0015277 | P3k59F       | Phosphotyrosinyl 3 kinase 59F                           | KK | 100296 | No phenotype |
| 271 | 301 | CG5409  | FBgn0011743 | Arn53D       | Actin-related protein 53D                               | KK | 108369 | No phenotype |
| 272 | 302 | CG5439  | FBgn0032476 | CG5439       | -                                                       | KK | 109602 | No phenotype |
| 273 | 303 | CG5498  | FBgn0027565 | CG5498       | -                                                       | KK | 103711 | No phenotype |
| 274 | 304 | CG5559  | FBgn0261089 | Sylalpha     | Synaptotagmin alpha                                     | KK | 100957 | No phenotype |
| 275 | 305 | CG5662  | FBgn0030620 | CG5662       | -                                                       | KK | 102645 | No phenotype |
| 276 | 306 | CG5722  | FBgn0024320 | Npc1a        | Niemann-Pick type C-1a                                  | KK | 105405 | No phenotype |
| 277 | 307 | CG5734  | FBgn0032191 | CG5734       | -                                                       | KK | 109452 | No phenotype |
| 278 | 308 | CG5885  | FBgn0068285 | Dyak1GE10193 | -                                                       | KK | 105974 | No phenotype |
| 279 | 309 | CG5886  | FBgn0039379 | CG5886       | -                                                       | KK | 106471 | No phenotype |
| 280 | 310 | CG6053  | FBgn0036195 | CG6053       | -                                                       | KK | 108601 | No phenotype |
| 281 | 311 | CG6129  | FBgn0039152 | Rootletin    | -                                                       | KK | 110171 | No phenotype |
| 282 | 312 | CG6196  | FBgn0038323 | CG6196       | -                                                       | KK | 101556 | No phenotype |
| 283 | 313 | CG6202  | FBgn0019925 | Surf4        | Surfeit 4                                               | KK | 108944 | No phenotype |
| 284 | 314 | CG6208  | FBgn0037789 | CG6208       | -                                                       | KK | 105575 | No phenotype |
| 285 | 315 | CG6259  | FBgn0036740 | CG6259       | -                                                       | KK | 101422 | No phenotype |
| 286 | 316 | CG6395  | FBgn0004179 | Csp          | Cysteine string protein                                 | KK | 103201 | No phenotype |
| 287 | 317 | CG6486  | FBgn0035922 | Pex7         | -                                                       | KK | 108795 | No phenotype |
| 288 | 318 | CG6512  | FBgn0036702 | CG6512       | -                                                       | KK | 109629 | No phenotype |
| 289 | 319 | CG6527  | FBgn0036085 | CG6527       | -                                                       | KK | 100865 | No phenotype |
| 290 | 320 | CG6549  | FBgn0024689 | fws          | four way stop                                           | KK | 110378 | No phenotype |
| 291 | 321 | CG6650  | FBgn0038916 | dnd          | dead end                                                | KK | 104311 | No phenotype |
| 292 | 322 | CG6822  | FBgn0035909 | ergic53      | ergic53                                                 | KK | 108445 | No phenotype |
| 293 | 323 | CG7094  | FBgn0032650 | CG7094       | -                                                       | KK | 108273 | No phenotype |
| 294 | 324 | CG7371  | FBgn0031710 | CG7371       | -                                                       | KK | 106958 | No phenotype |
| 295 | 325 | CG7452  | FBgn0035540 | Syx17        | Syntaxin 17                                             | KK | 108825 | No phenotype |
| 296 | 326 | CG7609  | FBgn0027518 | CG7609       | -                                                       | KK | 108562 | No phenotype |
| 297 | 327 | CG7700  | FBgn0044871 | Gos28        | Gos28                                                   | KK | 100289 | No phenotype |
| 298 | 328 | CG7735  | FBgn0034446 | CG7735       | -                                                       | KK | 104462 | No phenotype |
| 299 | 329 | CG7736  | FBgn0037084 | Syx6         | Syntaxin 6                                              | KK | 104795 | No phenotype |
| 300 | 330 | CG7747  | FBgn0034109 | CG7747       | -                                                       | KK | 105644 | No phenotype |
| 301 | 331 | CG7787  | FBgn0032020 | CG7787       | -                                                       | KK | 105730 | No phenotype |
| 302 | 332 | CG7791  | FBgn0033038 | CG7791       | -                                                       | KK | 109658 | No phenotype |
| 303 | 333 | CG7794  | FBgn0038565 | CG7794       | -                                                       | KK | 104265 | No phenotype |
| 304 | 334 | CG7846  | FBgn0030877 | Arp8         | Actin-related protein 8                                 | KK | 104425 | No phenotype |
| 305 | 335 | CG7864  | FBgn0035233 | Pex10        | -                                                       | KK | 110405 | No phenotype |
| 306 | 336 | CG8156  | FBgn0013750 | Arf51F       | ADP ribosylation factor 51F                             | KK | 100726 | No phenotype |
| 307 | 337 | CG8183  | FBgn0019968 | Khc-73       | Kinesin-73                                              | KK | 105984 | No phenotype |
| 308 | 338 | CG8219  | FBgn0035693 | CG8219       | -                                                       | KK | 103487 | No phenotype |
| 309 | 339 | CG8226  | FBgn0033357 | Tom7         | Translocase of outer membrane 7                         | KK | 102728 | No phenotype |
| 310 | 340 | CG8274  | FBgn0013756 | Mtor         | Megator                                                 | KK | 110218 | No phenotype |
| 311 | 341 | CG8315  | FBgn0034058 | Pex11        | -                                                       | KK | 105654 | No phenotype |
| 312 | 342 | CG8330  | FBgn0033074 | lomboy40     | lomboy40                                                | KK | 105557 | No phenotype |
| 313 | 343 | CG8407  | FBgn0033687 | CG8407       | -                                                       | KK | 100696 | No phenotype |
| 314 | 344 | CG8548  | FBgn0024889 | Kap-alpha1   | karyopherin alpha1                                      | KK | 108741 | No phenotype |
| 315 | 345 | CG8552  | FBgn0261164 | DsimCG8552   | -                                                       | KK | 108121 | No phenotype |
| 316 | 346 | CG9139  | FBgn0262937 | Rabex-5      | -                                                       | KK | 105534 | No phenotype |
| 317 | 347 | CG9240  | FBgn0030669 | CG9240       | -                                                       | KK | 103596 | No phenotype |
| 318 | 348 | CG9246  | FBgn0032925 | CG9246       | -                                                       | KK | 104868 | No phenotype |
| 319 | 349 | CG9279  | FBgn0085123 | DmirCG9279   | -                                                       | KK | 105109 | No phenotype |
| 320 | 350 | CG9313  | FBgn0086527 | DmirCG9313   | -                                                       | KK | 106167 | No phenotype |
| 321 | 351 | CG9359  | FBgn0003889 | betaTub85D   | beta-Tubulin at 85D                                     | KK | 109590 | No phenotype |
| 322 | 352 | CG9393  | FBgn0037710 | CG9393       | -                                                       | KK | 110385 | No phenotype |
| 323 | 353 | CG9423  | FBgn0027338 | Kap-alpha3   | karyopherin alpha3                                      | KK | 106249 | No phenotype |
| 324 | 354 | CG9446  | FBgn0033109 | coro         | coro                                                    | KK | 109644 | No phenotype |
| 325 | 355 | CG9543  | FBgn0068192 | Dyak1GE13901 | epsinCOP                                                | KK | 107588 | No phenotype |
| 326 | 356 | CG9901  | FBgn0011742 | Arp2         | Actin-related protein 14D                               | KK | 101999 | No phenotype |
| 327 | 357 | CG9913  | FBgn0038205 | Kir19A       | Kir19A                                                  | KK | 106569 | No phenotype |
| 328 | 358 | CG9962  | FBgn0034141 | CG9962       | -                                                       | KK | 108721 | No phenotype |
| 329 | 359 | CG8228  | FBgn0261049 | Vps45        | Vacuolar protein sorting 45                             | KK | 110660 | No phenotype |
| 330 | 360 | CG3210  | FBgn0026479 | Drp1         | Dynamin related protein 1                               | GD | 44156  | No phenotype |
| 331 | 361 | CG10653 | FBgn0001202 | hk           | hk.hook.Hook.dhk                                        | GD | 35483  | No phenotype |
| 332 | 362 | CG4027  | FBgn0000042 | Act5C        | l(1)G0009.l(1)G0010...                                  | KK | 101438 | No phenotype |
| 333 | 363 | CG10950 | FBgn0034205 | CG10950      | TRANSPORTIN 3 (PTHR12363:SF5)                           | GD | 41462  | No phenotype |
| 334 | 364 | CG11857 | FBgn0039303 | CG11857      | RER1 PROTEIN (PTHR10743)                                | GD | 23204  | No phenotype |
| 335 | 365 | CG3279  | FBgn0260862 | Vti1         | VESICLE TRANSPORT V-SNARE PROTEIN VTI1A (PTHR21230:SF3) | KK | 109819 | No phenotype |
| 336 | 366 | CG6192  | FBgn0032341 | Reps         | PARTNER OF RALBP-1 (PTHR11216:SF33)                     | KK | 110704 | No phenotype |
| 337 | 367 | CG4289  | FBgn0037020 | Pex14        | PEROXISOMAL MEMBRANE PROTEIN PEX14 (PTHR23058)          | GD | 42590  | No phenotype |
| 338 | 368 | CG33101 | FBgn0013998 | Nsf2         | NEM-sensitive fusion...                                 | GD | 7743   | No phenotype |

|     |     |         |             |              |                                                                        |    |        |              |  |
|-----|-----|---------|-------------|--------------|------------------------------------------------------------------------|----|--------|--------------|--|
| 339 | 369 | CG1763  | FBgn0002948 | nod          | no distributive disjunction                                            | GD | 48150  | No phenotype |  |
| 340 | 370 | CG17461 | FBgn0039925 | Kif3C        | KIF24,KIF3C,KIF3C,CG...                                                | GD | 43641  | No phenotype |  |
| 341 | 371 | CG2086  | FBgn0027594 | drpr         | draper                                                                 | GD | 27086  | No phenotype |  |
| 342 | 372 | CG3530  | FBgn0028497 | CG3530       | MYOTUBULARIN-like Bc...                                                | KK | 110786 | No phenotype |  |
| 343 | 373 | CG10047 | FBgn0028400 | Syt1         | synaptotagmin IV,Syn...                                                | GD | 33317  | No phenotype |  |
| 344 | 374 | CG6760  | FBgn0013563 | Pex1         | PEROXISOME BIOGENESIS FACTOR 1 (PEROXIN-1) (PTHR23077:SF12)            | GD | 27743  | No phenotype |  |
| 345 | 375 | CG3966  | FBgn0002936 | ninaA        | neither inactivation...                                                | GD | 51855  | No phenotype |  |
| 346 | 376 | CG6521  | FBgn0027363 | Slam         | SIGNAL TRANSDUCING ADAPTER MOLECULE (STAM) (PTHR13856:SF23)            | GD | 22497  | No phenotype |  |
| 347 | 377 | CG10617 | FBgn0261085 | Syt12        | SYNAPTOTAGMIN-12 (PTHR10024:SF15)                                      | KK | 110655 | No phenotype |  |
| 348 | 378 | CG7197  | FBgn0085149 | DsimWGD13004 | ADP-RIBOSYLATION FACTOR-LIKE 5, ARL5 (PTHR11711:SF31)                  | GD | 19736  | No phenotype |  |
| 349 | 379 | CG1724  | FBgn0031164 | CG1724       | BcDNA:AT13347                                                          | GD | 30317  | No phenotype |  |
| 350 | 380 | CG7765  | FBgn0001308 | Khc          | khc,Khc,KHC,KIF5A,ki...                                                | GD | 44337  | No phenotype |  |
| 351 | 381 | CG6392  | FBgn0040232 | cmet         | KINESIN-LIKE KINE TOCHORE MOTOR PROTEIN CENP (PTHR16012:SF190)         | GD | 35081  | No phenotype |  |
| 352 | 382 | CG3639  | FBgn0031282 | Pex12        | PEROXISOME ASSEMBLY PROTEIN 12 (PEROXIN-12) (PTHR12988)                | GD | 34671  | No phenotype |  |
| 353 | 383 | CG39878 | FBgn0027380 | Tim10        | MITOCHONDRIAL INNER MEMBRANE TRANSLOCASE SUBUNIT TIM10 (PTHR11038:SF8) | KK | 107111 | No phenotype |  |
| 354 | 384 | CG32593 | FBgn0264078 | Flo-2        | CG11547,CG14409,Flo-...                                                | GD | 31525  | No phenotype |  |
| 355 | 385 | CG11856 | FBgn0039302 | Nup358       | Nup358                                                                 | GD | 38583  | No phenotype |  |
| 356 | 386 | CG9308  | FBgn0034681 | CG9308       | COPII COATED VESICLE MEMBRANE PROTEIN P24 (PTHR22811:SF11)             | GD | 6806   | No phenotype |  |
| 357 | 387 | CG9778  | FBgn0261086 | Syt14        | Synaptotagmin 14                                                       | GD | 11037  | No phenotype |  |
| 358 | 388 | CG10986 | FBgn0082798 | Dpalq        | gamet,APL5 PROTEIN (PTHR22781:SF9)                                     | GD | 41369  | No phenotype |  |
| 359 | 389 | CG3002  | FBgn0030141 | Gga          | dmGGA,Gga,GGA                                                          | GD | 3270   | No phenotype |  |
| 360 | 390 | CG1333  | FBgn0261274 | Erc1L        | kiga,Endoplasmic ret...                                                | KK | 110454 | No phenotype |  |
| 361 | 391 | CG5510  | FBgn0039160 | CG5510       | VESICULAR INTEGRAL-MEMBRANE PROTEIN VIP36 (PTHR12223:SF6)              | KK | 109494 | No phenotype |  |
| 362 | 392 | CG7225  | FBgn0004003 | wbl          | wbl,wbl,wind,Wind,Wl...                                                | GD | 13864  | No phenotype |  |
| 363 | 393 | CG5521  | FBgn0039466 | CG5521       | TUBERIN (PTHR10063)                                                    | KK | 110722 | No phenotype |  |
| 364 | 394 | CG8566  | FBgn0034155 | unc-104      | imac,KIF1B,Klp53D,un...                                                | GD | 23465  | No phenotype |  |
| 365 | 395 | CG33162 | FBgn0011509 | SrpRbeta     | Signal recognition particle receptor beta                              | KK | 110760 | No phenotype |  |
| 366 | 396 | CG10859 | FBgn0032520 | CG10859      |                                                                        | GD | 27322  | No phenotype |  |
| 367 | 397 | CG2381  | FBgn0039900 | Syt7         | Synaptotagmin VII,Sy...                                                | GD | 24988  | No phenotype |  |
| 368 | 398 | CG9212  | FBgn0030724 | Nipsnap      | Nipsnap                                                                | GD | 28115  | No phenotype |  |
| 369 | 399 | CG5127  | FBgn0039335 | Vps33B       | Vacuolar protein sorting 33B                                           | GD | 47030  | No phenotype |  |
| 370 | 400 | CG4420  | FBgn0068678 | DsimCG4420   |                                                                        | GD | 40512  | No phenotype |  |
| 371 | 401 | CG33555 | FBgn0264754 | btsz         | l(3)10418,BcDNA:GH06...                                                | KK | 102608 | No phenotype |  |
| 372 | 402 | CG5962  | FBgn0000121 | Arr2         | phosrestin-1,phosres...                                                | GD | 20991  | No phenotype |  |
| 373 | 403 | CG3652  | FBgn0031600 | CG3652       |                                                                        | GD | 35575  | No phenotype |  |
| 374 | 404 | CG5675  | FBgn0026313 | X11L         | Mint,MINT,X11,X11L,X...                                                | GD | 27479  | No phenotype |  |
| 375 | 405 | CG1409  | FBgn0029964 | CG1409       | BcDNA:AT29287,D.M.BL...                                                | KK | 110447 | No phenotype |  |
| 376 | 406 | CG16976 | FBgn0264606 | CG43955      |                                                                        | KK | 110099 | No phenotype |  |
| 377 | 407 | CG5433  | FBgn0010235 | Klc          | kinesin,kinesin I,ki...                                                | GD | 39583  | No phenotype |  |
| 378 | 408 | CG11628 | FBgn0086779 | step         | Grp1,GRP1,cytohesin ...                                                | KK | 109449 | No phenotype |  |
| 379 | 409 | CG12234 | FBgn0084564 | DyakIGE17366 | Ranbp21,RanBP21,dmEx...                                                | GD | 31707  | No phenotype |  |
| 380 | 410 | CG11642 | FBgn0040340 | TRAM         | TRAM,CG18830,EG,BACR...                                                | GD | 39352  | No phenotype |  |
| 381 | 411 | CG7212  | FBgn0261532 | cdm          | importin 13,cadmus,c...                                                | GD | 40436  | No phenotype |  |
| 382 | 412 | CG6939  | FBgn0025802 | Sbf          | sbf,Sbf,SBF,Sbf1,SET...                                                | GD | 22317  | No phenotype |  |
| 383 | 413 | CG7815  | FBgn0036497 | ran-like     | ran-like,Ran-like,an...                                                | KK | 109695 | No phenotype |  |
| 384 | 414 | CG14955 | FBgn0035399 | CG14955      |                                                                        | KK | 109712 | No phenotype |  |
| 385 | 415 | CG3632  | FBgn0030735 | CG3632       | MYOTUBULARIN-like                                                      | KK | 110167 | No phenotype |  |
| 386 | 416 | CG4520  | FBgn0038355 | CG4520       |                                                                        | GD | 34863  | No phenotype |  |
| 387 | 417 | CG10379 | FBgn0015513 | mbc          | mbc,Mbc,MBC,myoblast...                                                | GD | 16044  | No phenotype |  |
| 388 | 418 | CG11427 | FBgn0003210 | rb           | rb,ruby,AP-3beta,bet...                                                | GD | 38504  | No phenotype |  |
| 389 | 419 | CG6562  | FBgn0034691 | synj         | IPP,synaptotagmin,syn...                                               | GD | 46070  | No phenotype |  |
| 390 | 420 | CG17762 | FBgn0030412 | tomosyn      | tomosyn,Tomosyn,BcDN...                                                | GD | 43629  | No phenotype |  |
| 391 | 421 | CG7364  | FBgn0028541 | TM9SF4       | TM9SF4                                                                 | GD | 7706   | No phenotype |  |
| 392 | 422 | CG6699  | FBgn0025724 | beta'Cop     | beta'-coatomer protein                                                 | GD | 42071  | No phenotype |  |
| 393 | 423 | CG1571  | FBgn0029993 | CG1571       | AXONEMAL DYNEIN INTERMEDIATE CHAIN (PTHR12442:SF7)                     | GD | 51846  | No phenotype |  |
| 394 | 424 | CG3267  | FBgn0042083 | CG3267       | l(2)4524,X11B,X11Lbe...                                                | KK | 105961 | No phenotype |  |
